# Supplementary material for: Knowledge, Attitudes and Perceptions of Medical Students on Antimicrobial Stewardship
Source: Antibiotics (Basel). 2020 Nov 17;9(11):821. doi: 10.3390/antibiotics9110821 (PMC7698472; doi:10.3390/antibiotics9110821)
Supplement: Supplementary file 1 [file antibiotics-09-00821-s001.pdf]

# Supplementary Material

**Table S1.** Studies on knowledge and attitudes of other healthcare professionals and non-medical students

| Author-Year                    | Study Summary                                                                                                                                     | Reason for Exclusion                                                                                                                              |
|--------------------------------|---------------------------------------------------------------------------------------------------------------------------------------------------|---------------------------------------------------------------------------------------------------------------------------------------------------|
| Childs-Kean et al. 2018 [1]    | Review of the published evidence describing and medical and pharmacy trainees' involvement in AMS and call for future research in this area.      | The study included medical interns, fellows and pharmacy residents.                                                                               |
| Wilcock et al. 2019 [2]        | The role of nurses and midwives and their contribution to AMS.                                                                                    | The study included nurses and midwives.                                                                                                           |
| Kufel et al. 2018 [3]          | Multicenter-cross-sectional study assessing the different AS program in USA for pharmacy students. Interprofessional collaboration may be needed. | The study included AMS programs for pharmacy students                                                                                             |
| Bowes et al. 2014 [4]          | Single-Center study. AMS programs should be included in the everyday clinical practice of pediatricians.                                          | The study included physicians and medical interns                                                                                                 |
| Revolisnki et al. 2020 [5]     | Understanding of AS by pharmacy students and how this can change after exposure to AMS techniques.                                                | The study included pharmacy students.                                                                                                             |
| Mersha et al. 2018 [6]         | Multi center, cross-sectional study. Medical interns want more education regarding AMS.                                                           | The study included medical interns                                                                                                                |
| Chahine et al. 2015 [7]        | Review of the published literature to propose a model to engage pharmacy students, residents and fellows in AMS                                   | The study included pharmacy students, residents and fellows.                                                                                      |
| Charani et al.2019 [8]         | International survey. AS policies are found more often in hospitals rather in primary care. Post graduate training is needed in all disciplines.  | The study included doctors, nurses, pharmacists and others (researchers, students and members of the public). No clear data for medical students. |
| Smith et al. 2019 [9]          | Knowledge and perceptions of veterinary students about AMR. The gap between theoretical knowledge and practical scenarios should be diminished.   | The study included veterinary students.                                                                                                           |
| Justo et al. 2014 [10]         | Knowledge and attitudes of pharmacy students regarding appropriate use of antibiotics                                                             | The study included pharmacy students                                                                                                              |
| Inácio et al. 2017 [11]        | Master of Pharmacy students' knowledge and awareness of antibiotic use, resistance and stewardship                                                | The study included master pharmacy students                                                                                                       |
| Rábano-Blanco et al. 2019 [12] | Nursing students' knowledge and awareness of antibiotic use, resistance and stewardship                                                           | The study included nursing students.                                                                                                              |
| Bonsignore et al. 2018 [13]    | Perspectives for anesthesiologists in hospital hygiene                                                                                            | The study included anesthesiology specialists.                                                                                                    |
| Siegfried et al. 2017 [14]     | Role of postgraduate year 2 pharmacy residents in providing weekend antimicrobial stewardship coverage in an academic medical center              | The study included pharmacy students.                                                                                                             |
| Khan et al. 2017 [15]          | Undergraduate antimicrobial stewardship training for pharmacy students: Creating a foundation for                                                 | The study included undergraduate pharmacy students.                                                                                               |

|                           |                                                                                                                                                                         |                                             |
|---------------------------|-------------------------------------------------------------------------------------------------------------------------------------------------------------------------|---------------------------------------------|
|                           | containment of antimicrobial resistance in South Africa                                                                                                                 |                                             |
| Almulhim et al. 2019 [16] | Optimization of antibiotic selection in the emergency department for urine culture follow ups, a retrospective pre-post intervention study: Clinical pharmacist efforts | The study included pharmacists' strategies. |
| Peel et al. 2020 [17]     | Perioperative antimicrobial decision making: Focused ethnography study in orthopedic and cardiothoracic surgeries in an Australian hospital                             | The study did not include medical students  |

## References:

1. Childs-Kean, L.M.; Briggs, H.L.; Cho, J.C. All aboard!: Involvement of medical and pharmacy trainees in antimicrobial stewardship. *Infect Control Hosp Epidemiol.* **2018**, *40*, 200-205, DOI: 10.1017/ice.2018.332
2. Wilcock, M.; Powell, N.; Underwood, F. Antimicrobial stewardship and the hospital nurse and midwife: How do they perceive their role? *Eur J Hosp Pharm.* **2019**, *26*, 89-92, DOI: 10.1136/ejhp-2017-001312
3. Kufel, W.D.; Jeffres, M.N.; MacDougall, C.; Cho, J.C.; Marx, A.H.; Williams, D.M. Antimicrobial stewardship education in US colleges and schools of pharmacy. *J. Antimicrob. Chemother.* **2018**, *73*, 2252-2258, DOI: 10.1093/jac/dky166
4. Bowes, J.; Yaseen A.S.; Barrowman, N.; Murchison, B.; Dennis, J.; Moreau, K.A.; Varughese, N.; Le Saux, N. Antimicrobial stewardship in pediatrics: Focusing on the challenges clinicians face. *BMC Pediatr.* **2014**, *14*:212, DOI: 10.1186/1471-2431-14-212
5. Revolinski, S.; Pawlak, J.; Beckers, C. Assessing Pharmacy Students' and Preceptors' Understanding of and Exposure to Antimicrobial Stewardship Practices on Introductory Pharmacy Practice Experiences. *Pharmacy (Basel).* **2020**, *8*, DOI: 10.3390/pharmacy8030149
6. Mersha, A.G. Attitude and perception of medical interns about antimicrobial resistance: A multi center cross-sectional study in Ethiopia 11 Medical and Health Sciences 1117 Public Health and Health Services. *Antimicrob. Resist. Infect. Control.* **2018**, *7*, DOI: 10.1186/s13756-018-0443-9
7. Chahine, E.B.; El-Lababidi, R.M.; Sourial, M. Engaging pharmacy students, residents, and fellows in antimicrobial stewardship. *J. Pharm. Pract.* **2015**, *28*, 585-591, DOI: 10.1177/0897190013516506
8. Charani, E.; Castro- Sánchez, E.; Bradley, S.; Nathwani, D.; Holmes, A.H.; Davey, P. Implementation of antibiotic stewardship in different settings - results of an international survey. *Antimicrob Resist Infect Control.* **2019**, *8*, DOI: 10.1186/s13756-019-0493-7
9. Smith, P.W.; Agbaje, M.; LeRoux-Pullen, L.; van Dyk, D.; Debusho, L.K.; Shittu, A.; Sirdar, M.M.; Fasanmi, O.G.; Adebawale, O.; Fasina, F.O. Implication of the knowledge and perceptions of veterinary students of antimicrobial resistance for future prescription of antimicrobials in Animal health, South Africa. *J S Afr Vet Assoc.* **2019**, *90*, DOI: 10.4102/jsava.v90i0.1765
10. Justo, J.A.; Gauthier, T.P.; Scheetz, M.H.; Chahine, E.B.; Bookstaver, E.B.; Gallagher, J.C.; Hermesen, E.D.; DePestel, D.D.; Ernst, E.J.; Jacobs, D.M.; Esterly, J.S.; Suda, K.J.; Olsen, K.M.; Abbo, L.M.; MacDougall, C. Knowledge and attitudes of doctor of pharmacy students regarding the appropriate use of antimicrobials. *Clin. Infect. Dis.* **2014**, *59*, 162-169, DOI: 10.1093/cid/ciu537
11. Inácio, J.; Barnes, L.-M.; Jeffs, S.; Castanheira, P.; Wiseman, M.; Inácio, S.; Bowler, L.; Lansley, A. Master of Pharmacy students' knowledge and awareness of antibiotic use, resistance and stewardship. *Curr. Pharm. Tech. Learn.* **2017**, *9*, 551-559, DOI: 10.1016/j.cptl.2017.03.021

12. Rábano-Blanco, A.; Domínguez-Martís, E.M.; Mosteiro-Miguéns, D.G.; Freire-Garabal, M.; Novío, S. Nursing students' knowledge and awareness of antibiotic use, resistance and stewardship: A descriptive cross-sectional study. *Antibiotics*. **2019**, *8*, DOI: 10.3390/antibiotics8040203
13. Bonsignore, M.; Alefelder, .C.; Pausner, N.; Gastmeier, P.; Nachtigall, I. Perspectives for anesthesiologists in hospital hygiene. *Anaesthesist*. **2018**, *67*, 758-765, DOI:10.1007/s00101-018-0478-6
14. Siegfried, J.; Merchan, C.; Scipione, M.R.; Papadopoulos, J.; Dabestani, A.; Dubrovskaya, Y. Role of postgraduate year 2 pharmacy residents in providing weekend antimicrobial stewardship coverage in an academic medical center. *Am. J. Health-Syst. Pharm.* **2017**, *74*, 417-423, DOI: 10.2146/ajhp160133
15. Khan, Y.; Boschmans, S.A.; McCartney, J.; Coetzee, R. Undergraduate antimicrobial stewardship training for pharmacy students: Creating a foundation for containment of antimicrobial resistance in South Africa. *S. Afr. Med. J.* **2017**, *107*, 722, DOI: 10.7196/SAMJ.2017.v107i9.12649
16. Almulhim, A.S.; Aldayyen, A.; Yenina, K.; Chiappini, A.; Khan, T.M. Optimization of antibiotic selection in the emergency department for urine culture follow ups, a retrospective pre-post intervention study: Clinical pharmacist efforts. *J. Pharm. Policy Pract.* **2019**, *12*, DOI: 10.1186/s40545-019-0168-z
17. Peel, T.; Watson, E.; Cairns, K.; Lam, H.Y.A.; Li, H.Z.; Ravindran, G.; Seneviratne, J.; Daly, D.; Liew, S.; McGiffin, D.; Myles, P.; Ayton, D. Perioperative antimicrobial decision making: Focused ethnography study in orthopedic and cardiothoracic surgeries in an Australian hospital. *Infect. Control. Hosp. Epidemiol.* **2020**, *41*, 645-652, DOI: 10.1017/ice.2020.48
